# Supplementary material for: Water Content of Polyelectrolyte Multilayer Films Measured by Quartz Crystal Microbalance and Deuterium Oxide Exchange
Source: PubMed Central journal article supplement (PMC7866239; doi:10.3390/s21030771), 2021-01-24
Supplement: sensors-21-00771-s001.pdf [file sensors-21-00771-s001.pdf]

Supporting Information

**Water Content of Polyelectrolyte Multilayer Films  
Measured by Quartz Crystal Microbalance and  
Deuterium Oxide Exchange**

*Joshua Kittle<sup>1,\*</sup>, Jacob Levin<sup>1</sup>, Nestor Levin<sup>1</sup>*

<sup>1</sup> Department of Chemistry, United States Air Force Academy, 2355 Fairchild Drive, 80840

Colorado Springs, Colorado, United States; Joshua.Kittle@afacademy.af.edu (J.K.);

C21Jacob.Levin@afacademy.af.edu (J.L.); C22Nestor.Levin@afacademy.af.edu (N.L.)

**\*To whom correspondences should be addressed:** Joshua.Kittle@afacademy.af.edu

## Provided Supporting Information

### I. Representative QCM Data for PAH/PSS Adsorption and D<sub>2</sub>O Solvent Exchange

**Figure S1:** Representative frequency shift data ( $n = 5$ ) for the adsorption of a one-layer PAH film, followed by D<sub>2</sub>O solvent exchange.

**Figure S2:** Representative frequency shift data ( $n = 5$ ) for the adsorption of a two-layer PAH/PSS film, followed by D<sub>2</sub>O solvent exchange.

**Figure S3:** Representative frequency shift data ( $n = 5$ ) for the adsorption of a three-layer PAH/PSS film, followed by D<sub>2</sub>O solvent exchange.

**Figure S4:** Representative frequency shift data ( $n = 5$ ) for the adsorption of a four-layer PAH/PSS film, followed by D<sub>2</sub>O solvent exchange.

**Figure S5:** Representative frequency shift data ( $n = 5$ ) for the adsorption of a five-layer PAH/PSS film, followed by D<sub>2</sub>O solvent exchange.

**Figure S6:** Representative frequency shift data ( $n = 5$ ) for the adsorption of a six-layer PAH/PSS film, followed by D<sub>2</sub>O solvent exchange.

**Figure S7:** Representative frequency shift data ( $n = 5$ ) for the adsorption of a seven-layer PAH/PSS film, followed by D<sub>2</sub>O solvent exchange.

**Figure S8:** Representative frequency shift data ( $n = 5$ ) for the adsorption of an eight-layer PAH/PSS film, followed by D<sub>2</sub>O solvent exchange.

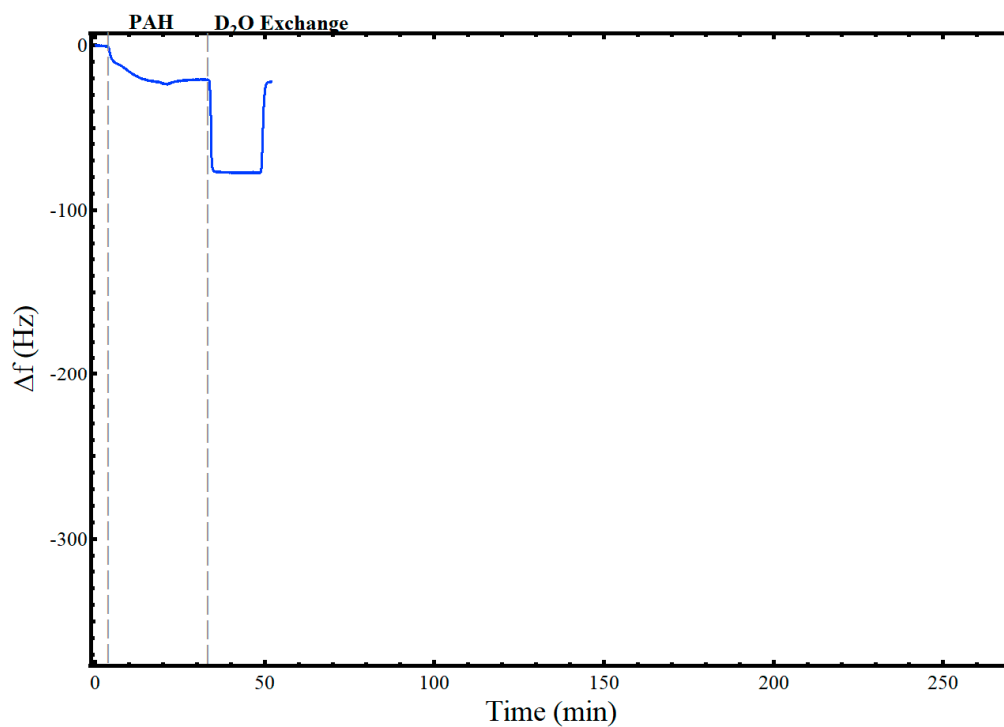

**Figure S1:** Representative frequency shift data ( $n = 5$ ) for the adsorption of a one-layer PAH film, followed by D<sub>2</sub>O solvent exchange.

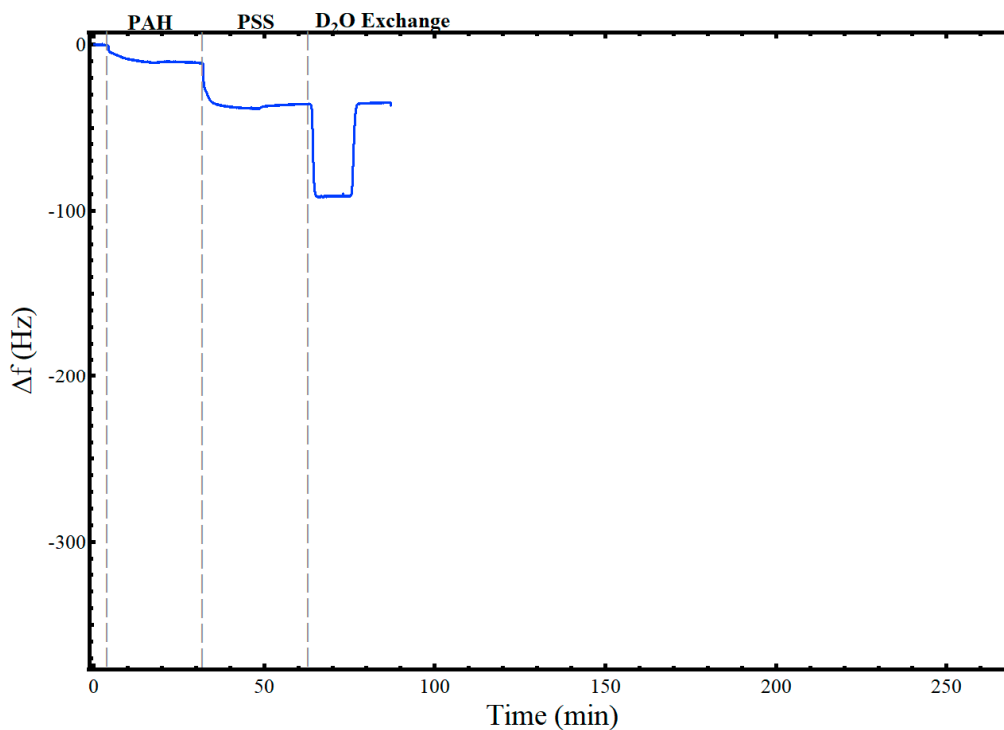

**Figure S2:** Representative frequency shift data ( $n = 5$ ) for the adsorption of a two-layer PAH/PSS film, followed by D<sub>2</sub>O solvent exchange.

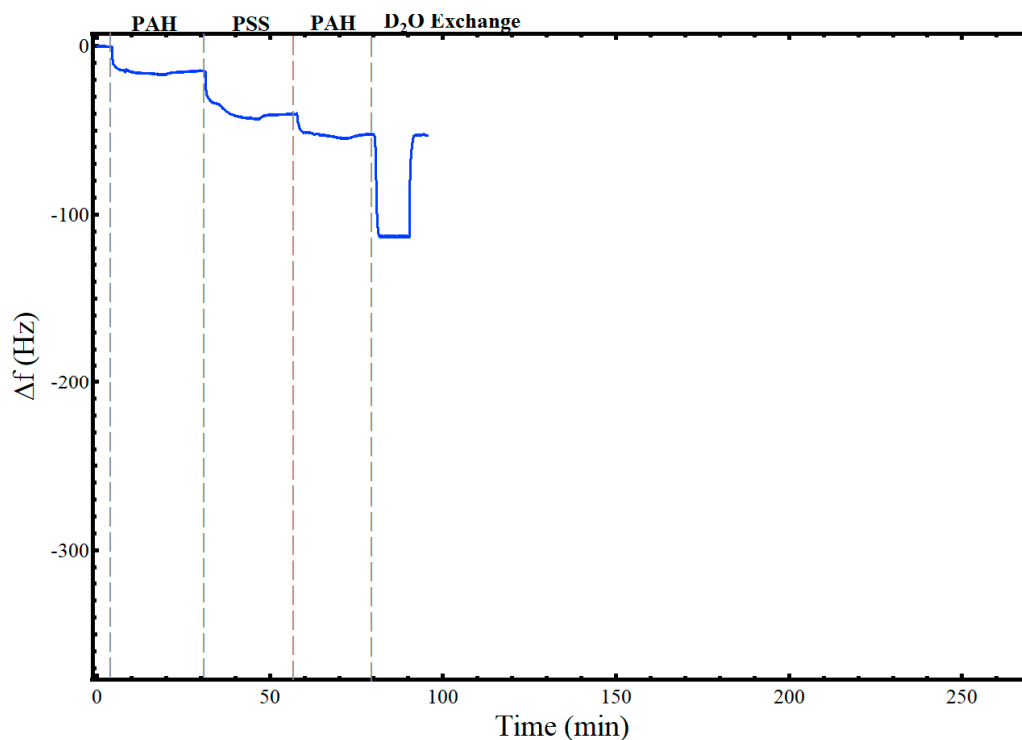

**Figure S3:** Representative frequency shift data ( $n = 5$ ) for the adsorption of a three-layer PAH/PSS film, followed by D<sub>2</sub>O solvent exchange.

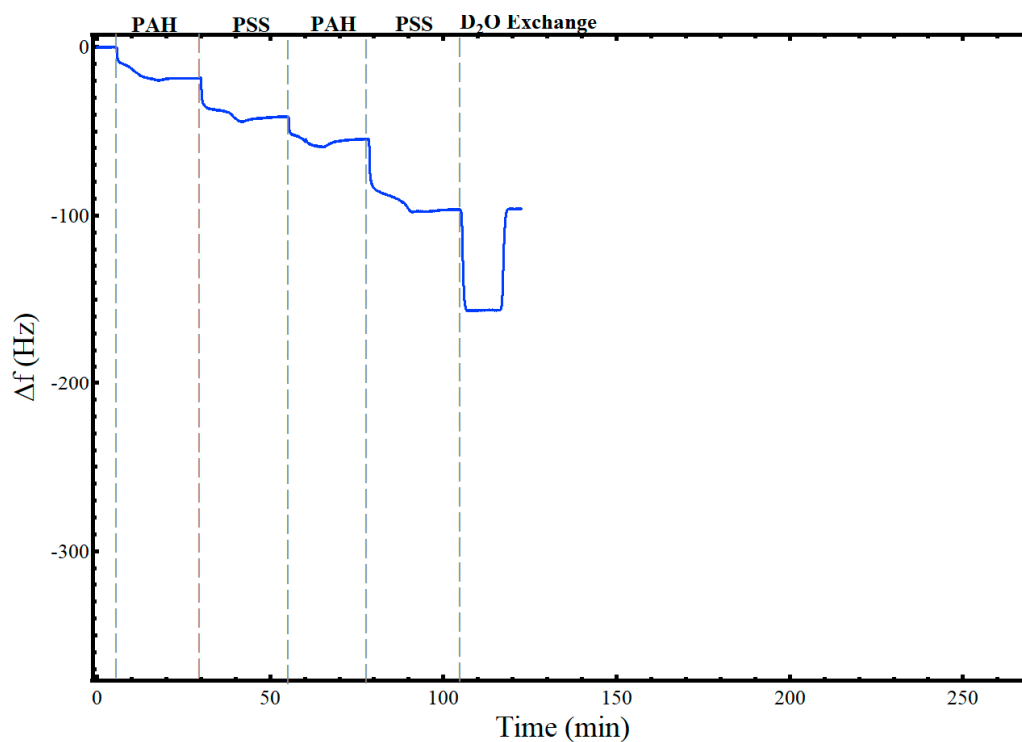

**Figure S4:** Representative frequency shift data ( $n = 5$ ) for the adsorption of a four-layer PAH/PSS film, followed by D<sub>2</sub>O solvent exchange.

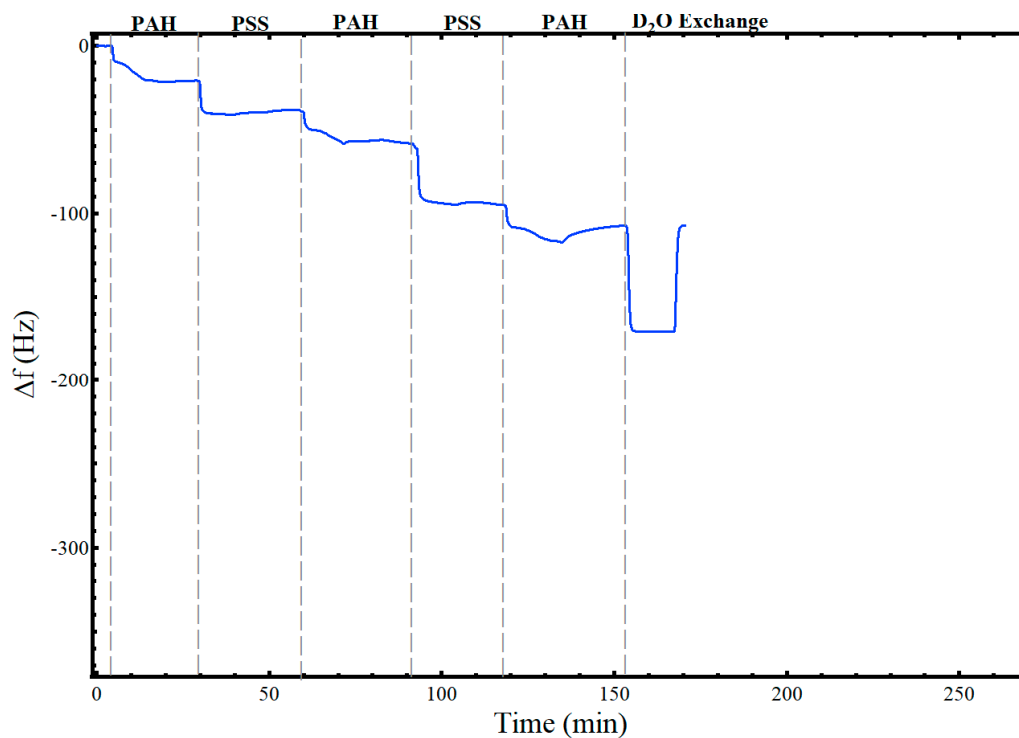

**Figure S5:** Representative frequency shift data ( $n = 5$ ) for the adsorption of a five-layer PAH/PSS film, followed by D<sub>2</sub>O solvent exchange.

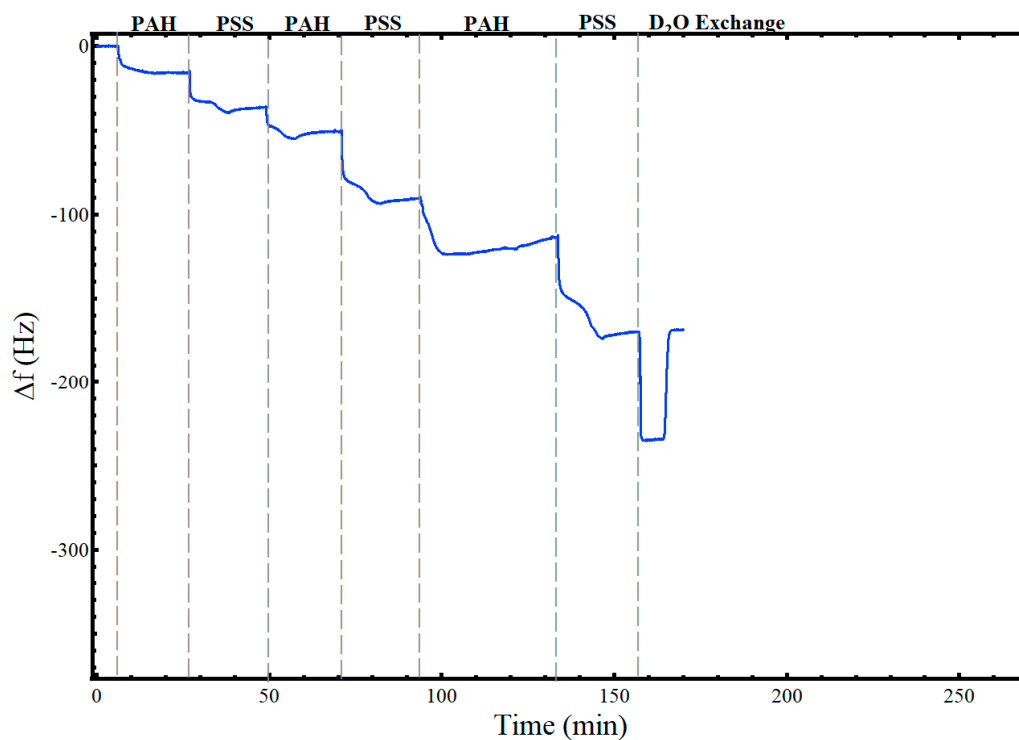

**Figure S6:** Representative frequency shift data ( $n = 5$ ) for the adsorption of a six-layer PAH/PSS film, followed by D<sub>2</sub>O solvent exchange.

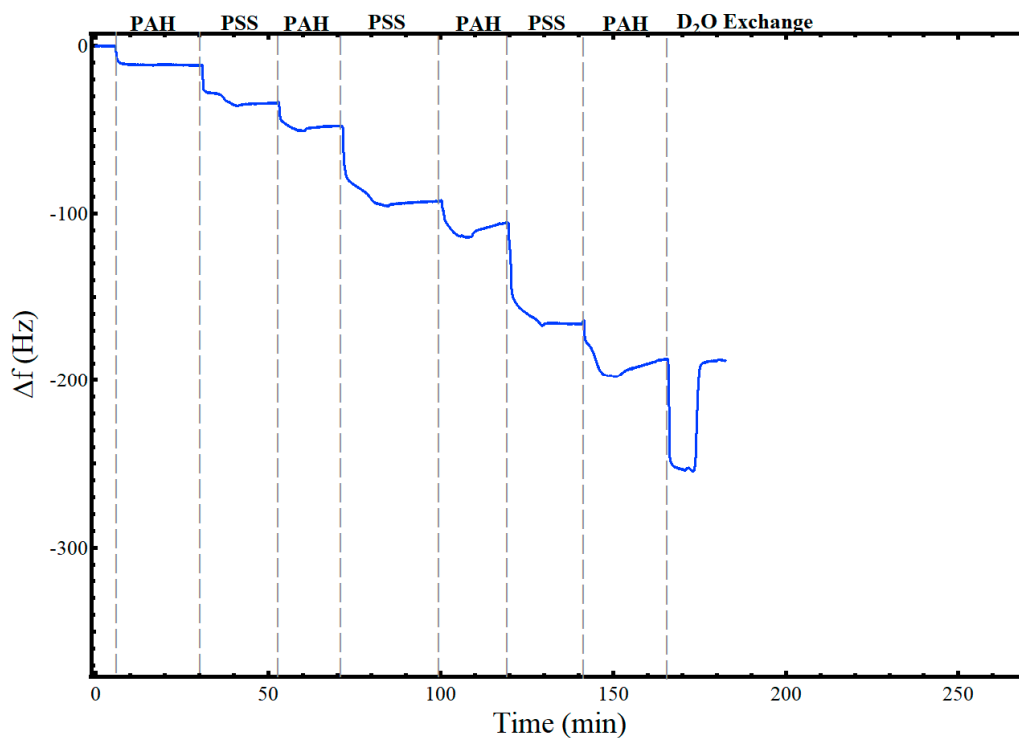

**Figure S7:** Representative frequency shift data ( $n = 5$ ) for the adsorption of a seven-layer PAH/PSS film, followed by D<sub>2</sub>O solvent exchange.

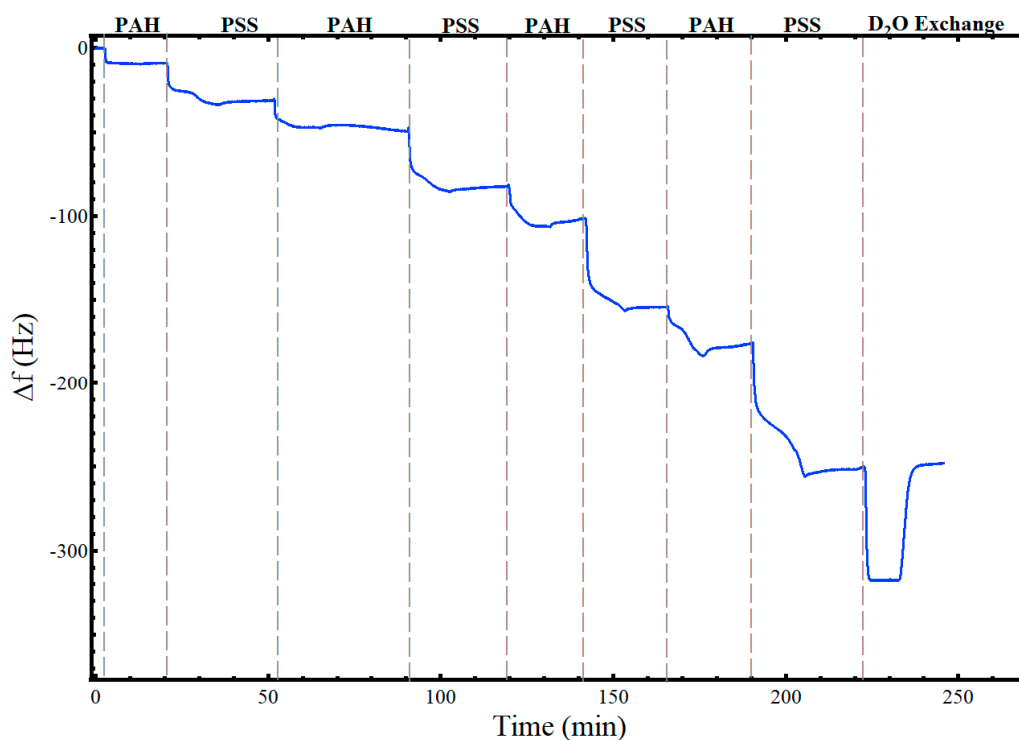

**Figure S8:** Representative frequency shift data ( $n = 5$ ) for the adsorption of an eight-layer PAH/PSS film, followed by D<sub>2</sub>O solvent exchange.
